# Supplementary material
Source: publisher figshare collection journal article supplement (https://gsapubs.figshare.com/ndownloader/files/39634108)
Supplement: Supplementary file 1 [file 39634108]

## Sheet: Sheet2
Eartly Cretaceous Cooling, no Cenozoic cooling pulse (solid brown line Fig 2C)
Time (Ma)	Temp (°C)
130	120
120	110
115	25
0	20
Late Cretaceous Cooling, no Cenozoic cooling pulse (dashed brown line Fig 2C)
Time (Ma)	Temp (°C)
120	120
95	110
90	25
0	20
Early Cretaceous Cooling, 15-13 Ma Cenozoic cooling pulse (solid blue line Fig 2C, 3C, 3F)
Time (Ma)	Temp (°C)
130	120
120	110
115	40
15	38
13	23
0	20
Late Cretaceous Cooling, 15-13 Ma Cenozoic cooling pulse (dashed blue line Fig 2C, 3C, 3F)
Time (Ma)	Temp (°C)
120	120
95	110
90	40
15	38
13	23
0	20
Early Cretaceous Cooling, 35-30 Ma Cenozoic cooling pulse (solid dark purple line Fig 3C)
Time (Ma)	Temp (°C)
130	120
120	110
115	40
35	38
30	23
0	20
Late Cretaceous Cooling, 35-30 Ma Cenozoic cooling pulse (dashed dark purple line Fig 3C)
Time (Ma)	Temp (°C)
120	120
95	110
90	40
35	38
30	23
0	20
Early Cretaceous Cooling, 5-1 Ma Cenozoic cooling pulse (solid green line Fig 3C)
Time (Ma)	Temp (°C)
130	120
120	110
115	40
5	38
1	23
0	20
Late Cretaceous Cooling, 5-1 Ma Cenozoic cooling pulse (dashed green line Fig 3C)
Time (Ma)	Temp (°C)
120	120
95	110
90	40
5	38
1	23
0	20
Early Cretaceous Cooling, 25°C 15-13 Ma Cenozoic cooling pulse (solid purple line Fig 3F)
Time (Ma)	Temp (°C)
130	120
120	110
115	50
15	48
13	23
0	20
Late Cretaceous Cooling, 25°C 15-13 Ma Cenozoic cooling pulse (dashed purple line Fig 3F)
Time (Ma)	Temp (°C)
120	120
95	110
90	50
15	48
13	23
0	20
Early Cretaceous Cooling, 35°C 15-13 Ma Cenozoic cooling pulse (solid pink line Fig 3F)
Time (Ma)	Temp (°C)
130	120
120	110
115	60
15	58
13	23
0	20
Late Cretaceous Cooling, 35°C 15-13 Ma Cenozoic cooling pulse (dashed pink line Fig 3F)
Time (Ma)	Temp (°C)
120	120
95	110
90	60
15	58
13	23
0	20
